# Supplementary material
Source: PubMed Central journal article supplement (PMC2292425)
Supplement: 125_2008_970_MOESM1_ESM.pdf [file 125_2008_970_MOESM1_ESM.pdf]

**Table 1** *IGF1* SNPs genotyped in ALSPAC children

| SNP        | Sequence               | Allele, 1<br>(minor)/2 | MAF   | Location relative<br>to <i>IGF1</i> locus |
|------------|------------------------|------------------------|-------|-------------------------------------------|
| rs12579108 | TAGCTAAC[A/C]GCAAGGAT  | A/C                    | 0.013 | 5' region                                 |
| rs10557735 | ATTTGAGA[-/TA]GTTATTTT | Ins/Del                | 0.244 | Intron 2                                  |
| rs6214     | GACTTAAC[A/G]TGTTTTCT  | A/G                    | 0.345 | Exon 4 (3' UTR)                           |
| rs3730220  | CAGGTTGG[A/T]CTCAAAC   | T/A                    | 0.274 | Exon 4 (3' UTR)                           |
| rs6219     | AACCTCAA[A/G]CTGTCTAC  | A/G                    | 0.09  | Exon 4 (3' UTR)                           |
| rs3730204  | TCAAATGA[C/T]GAGTTAAT  | C/T                    | 0.013 | Exon 4 (3' UTR)                           |
| rs2946831  | CTGATAGG[G/T]TTGAAACT  | G/T                    | 0.057 | 3' region                                 |

UTR, untranslated region
