# Supplementary material
Source: PubMed Central journal article supplement (PMC2292425)
Supplement: 125_2008_970_MOESM2_ESM.pdf [file 125_2008_970_MOESM2_ESM.pdf]

**Table 2** TRANSMIT analysis for association of the microsatellite in the 5' region of *IGF1* with type 1 diabetes

| Size (bp) | $\chi^2$   | <i>p</i> value based on 1,000 bootstrap samples |
|-----------|------------|-------------------------------------------------|
| 188       | 2.021      | 0.135                                           |
| 190       | 0.024      | 0.885                                           |
| 192       | 0.030      | 0.885                                           |
| 194       | 0.326      | 0.569                                           |
| 196       | 0.721      | 0.408                                           |
| 198       | 2.946      | 0.096                                           |
| 200       | 0.600      | 0.467                                           |
|           | $\chi^2_6$ |                                                 |
| Global    | 6.531      | 0.358                                           |

Microsatellite is in position 101399183 of chromosome 12 and was amplified using 5'-ACCACTCTGGGAGAAGGGTA-3' and 5'-GCTAGCCAGCTGGTGTTATT-3' as the forward and reverse primer, respectively
