# Supplementary material
Source: PubMed Central journal article supplement (PMC2292425)
Supplement: 125_2008_970_MOESM3_ESM.pdf [file 125_2008_970_MOESM3_ESM.pdf]

**Table 3** Summary of 23 WTCCC SNPs in the extended *IGF1* region

| Locus      | MAF   | Controls | Cases | <i>p</i> value | OR    | 95% CI      |
|------------|-------|----------|-------|----------------|-------|-------------|
| rs2072592  | 0.012 | 2,888    | 1,964 | 0.037          | 1.455 | 1.025–2.067 |
| rs11111285 | 0.034 | 2,891    | 1,963 | 0.041          | 1.253 | 1.010–1.554 |
| rs12423791 | 0.010 | 2,875    | 1,948 | 0.074          | 1.414 | 0.968–2.065 |
| rs17032623 | 0.011 | 2,891    | 1,963 | 0.096          | 1.367 | 0.947–1.973 |
| rs4764698  | 0.011 | 2,893    | 1,963 | 0.134          | 1.322 | 0.919–1.903 |
| rs2946831  | 0.060 | 2,892    | 1,963 | 0.175          | 1.124 | 0.950–1.329 |
| rs10860860 | 0.323 | 2,891    | 1,962 | 0.243          | 0.948 | 0.868–1.037 |
| rs11111272 | 0.279 | 2,891    | 1,960 | 0.302          | 1.049 | 0.958–1.149 |
| rs978458   | 0.254 | 2,892    | 1,960 | 0.305          | 1.050 | 0.956–1.154 |
| rs10745940 | 0.278 | 2,890    | 1,961 | 0.353          | 1.044 | 0.953–1.144 |
| rs35765    | 0.114 | 2,881    | 1,960 | 0.397          | 1.058 | 0.929–1.205 |
| rs5742678  | 0.255 | 2,892    | 1,957 | 0.409          | 1.040 | 0.947–1.143 |
| rs9308315  | 0.255 | 2,876    | 1,949 | 0.428          | 1.039 | 0.945–1.142 |
| rs12821878 | 0.234 | 2,888    | 1,962 | 0.456          | 0.963 | 0.873–1.063 |
| rs1019731  | 0.141 | 2,892    | 1,961 | 0.610          | 0.969 | 0.860–1.093 |
| rs5742614  | 0.003 | 2,893    | 1,961 | 0.706          | 1.142 | 0.575–2.267 |
| rs10860864 | 0.183 | 2,891    | 1,961 | 0.712          | 0.980 | 0.880–1.091 |
| rs5742652  | 0.024 | 2,887    | 1,961 | 0.779          | 1.039 | 0.794–1.360 |

|            |       |       |       |       |       |             |
|------------|-------|-------|-------|-------|-------|-------------|
| rs2373721  | 0.243 | 2,891 | 1,961 | 0.781 | 1.014 | 0.921–1.116 |
| rs17727841 | 0.182 | 2,887 | 1,961 | 0.813 | 0.987 | 0.887–1.099 |
| rs10860869 | 0.269 | 2,891 | 1,963 | 0.838 | 0.990 | 0.901–1.088 |
| rs5742632  | 0.235 | 2,882 | 1,954 | 0.857 | 0.991 | 0.898–1.093 |
| rs12299353 | 0.000 | 2,893 | 1,963 |       |       |             |

---

*p* value, single locus test assuming multiplicative allelic effects
