# Supplementary material
Source: PubMed Central journal article supplement (PMC2292425)
Supplement: 125_2008_970_MOESM4_ESM.pdf [file 125_2008_970_MOESM4_ESM.pdf]

**Table 4** Multilocus test for associations with IGF-1 protein levels, childhood growth and glucose metabolism in a representative birth cohort

|                                                    | <i>n</i> | <i>R</i> <sup>2</sup> | <i>p</i> value |
|----------------------------------------------------|----------|-----------------------|----------------|
| IGF-1 levels at birth (ng/ml)                      | 203      | 0.063                 | 0.029          |
| IGF-1 levels (ng/ml) at 7 or 8 years (SDS)         | 443      | 0.030                 | 0.055          |
| Birthweight (SD)                                   | 787      | 0.009                 | 0.408          |
| Birth length (SDS)                                 | 666      | 0.012                 | 0.296          |
| Height at 7 years (SDS)                            | 561      | 0.007                 | 0.750          |
| Weight at 7 years (SDS)                            | 561      | 0.015                 | 0.145          |
| BMI at 7 years (kg/m <sup>2</sup> )                | 561      | 0.015                 | 0.214          |
| Body fat mass at 9 years (kg)                      | 506      | 0.014                 | 0.220          |
| Insulin sensitivity at 8 years (HOMA)              | 322      | 0.008                 | 0.922          |
| Insulin secretion at 8 years (insulinogenic index) | 301      | 0.024                 | 0.465          |

The multilocus tests are based on all seven *IGF1* tag-SNPs in additive models, adjusted for sex, age and parity

HOMA, homeostasis model assessment; SDS, standard deviation score
