# Supplementary material
Source: PubMed Central journal article supplement (PMC2292425)
Supplement: 125_2008_970_MOESM5_ESM.pdf [file 125_2008_970_MOESM5_ESM.pdf]

**Table 5** Association testing for the 5' *IGF1* CA repeat with childhood growth and glucose metabolism in a representative birth cohort

|                                                       | <i>n</i> | 192         | 192/+      | +/+         | <i>p</i> value |
|-------------------------------------------------------|----------|-------------|------------|-------------|----------------|
| IGF-1 levels at birth (ng/ml)                         | 307      | 91.13±3.12  | 90.88±3.35 | 86.69±6.05  | 0.798          |
| IGF-1 levels (ng/ml) at 7 or 8 years (SDS)            | 582      | -0.029±0.06 | 0.032±0.06 | -0.06±0.11  | 0.702          |
| Birthweight (SDS)                                     | 902      | -0.009±0.05 | 0.023±0.05 | 0.043±0.08  | 0.824          |
| Birth length (SDS)                                    | 761      | 0.064±0.05  | 0.022±0.05 | 0.008±0.09  | 0.812          |
| Head circ at birth (SDS)                              | 777      | 0.021±0.05  | 0.027±0.05 | -0.091±0.09 | 0.534          |
| Height at 7 years (SDS)                               | 716      | -0.010±0.05 | 0.021±0.06 | -0.035±0.10 | 0.876          |
| Weight at 7 years (SDS)                               | 716      | -0.051±0.05 | 0.066±0.05 | 0.049±0.10  | 0.340          |
| BMI at 7 years (kg/m <sup>2</sup> )                   | 716      | 16.11±0.11  | 16.38±0.12 | 16.40±0.21  | 0.234          |
| Body fat mass at 9 years (kg)                         | 643      | 8.892±0.03  | 8.931±0.03 | 8.873±0.05  | 0.516          |
| Insulin sensitivity at 8 years (square root of HOMA%) | 389      | 14.02±0.36  | 13.66±0.33 | 13.58±0.54  | 0.682          |
| Insulin secretion at 8 years (insulinogenic index)    | 361      | 3.761±0.04  | 3.704±0.04 | 3.703±0.07  | 0.636          |

*p* values are from additive models, adjusted for sex, age and parity

Circ, circumference; HOMA, homeostasis model assessment; SDS, standard deviation score
